# Supplementary material
Source: publisher figshare collection journal article supplement (https://sage.figshare.com/ndownloader/files/16257359)
Supplement: Supplementary file 1 [file 16257359]

Appendix 1

*Curriculum from competency models*

| **ACHE Competency Domains** | **HA5303** | | |
| --- | --- | --- | --- |
| **Competencies addressed and level of understanding** | **Teaching & learning method** | **How assessed** |
| **Leadership** | Leadership skills and behavior (K) Operational climate and culture (K) | Readings, Lectures with media, class discussions, in-class delivery by students | Chapter summary (individual), exams |
| **Communications and relationship management** |  | Readings, Lectures with media, class discussions, in-class delivery by students | Article presentation (Individual), Project presentation (Group) |
| **Knowledge of the HC environment** | Healthcare systems and organizations (K) | Readings, Lectures with media, class discussions, in-class delivery by students | Chapter summary (individual), exams |
| **Business skills and knowledge** | Organizational dynamics and governance (K) Information management (A) | Readings, Lectures with media, class discussions, in-class delivery by students | Manuscript (Group) |

*Learning objectives for MHIT course (5303)*

| 1.      Enumerate the scope of issues/technologies surrounding the management of health information resources, and explain the Chief Information Officer’s leadership responsibilities associated with information management. |
| --- |
|  |
| 2.      Differentiate the difference between data, information, and knowledge; how does the data collected at the point of care transform to information (for diagnoses) and knowledge (for organizational management)? |
|  |
| 3.      Identify, describe, and apply the basic elements of Systems Theory, and explain its significance to the management of HIT. |
|  |
| 4.      Assess the value of information technology as related to health outcomes. |
|  |
| 5.      Compare the components, evolution, and current applications/functions of: hardware, software, and telecommunications considering appropriate healthcare policy. |
|  |
| 6.      Evaluate the analysis/decision making process required when acquiring new equipment/systems (systems selection process); articulate the challenges for evaluation of health IM/IT systems, and compare critical success factors (CSF) associated with MHIS implementation. |
|  |
| 7.      Compare and contrast the information needs met by transaction processing systems, management information systems, and executive information systems. |
|  |
| 8.      Design a plan to lever MHIS to provide strategic value to an organization. |
